# Supplementary material for: Optimization of Al2O3/TiO2 nanolaminate thin films prepared with different oxide ratios, for use in organic light-emitting diode encapsulation, via plasma-enhanced atomic layer deposition
Source: Royal Society of Chemistry journal article supplement (doi:10.1039/c5cp06713h), 2015-11-23
Supplement: c5cp06713h1.pdf [file c5cp06713h1.pdf]

## Supporting Information for

### *Optimization of Al<sub>2</sub>O<sub>3</sub>/TiO<sub>2</sub> Nanolaminate Thin Films Prepared with Different Oxide Ratios, for use in Organic Light-Emitting Diode Encapsulation, via Plasma-Enhanced Atomic Layer Deposition*

Lae Ho Kim<sup>a</sup>, Yong Jin Jeong<sup>a</sup>, Tae Kyu An<sup>b</sup>, Seonuk Park<sup>a</sup>, Jin Hyuk Jang<sup>a</sup>, Sooji Nam<sup>c</sup>, Jaeyoung Jang<sup>d\*</sup>, Se Hyun Kim<sup>e\*</sup>, and Chan Eon Park<sup>a\*</sup>

<sup>a</sup> Polymer Research Institute, Department of Chemical Engineering, Pohang University of Science and Technology, Pohang, 790-784, Republic of Korea. E-mail: [cep@postech.ac.kr](mailto:cep@postech.ac.kr)

<sup>b</sup> Department of Polymer Science and Engineering, Korea National University of Transportation, Chungju-si, Chungbuk, 380-702, Republic of Korea.

<sup>c</sup> Smart I/O Control Device Research Section, Electronics and Telecommunications Research Institute, Daejeon, 305-700, Republic of Korea.

<sup>d</sup> Department of Energy Engineering, Hanyang University, Seoul, 133-791, Republic of Korea. E-mail: [jjjang15@hanyang.ac.kr](mailto:jjjang15@hanyang.ac.kr)

<sup>e</sup> School of Materials Science and Engineering, Yeungnam University, Gyeongsan, 712-749, Republic of Korea. E-mail: [shkim97@yu.ac.kr](mailto:shkim97@yu.ac.kr)

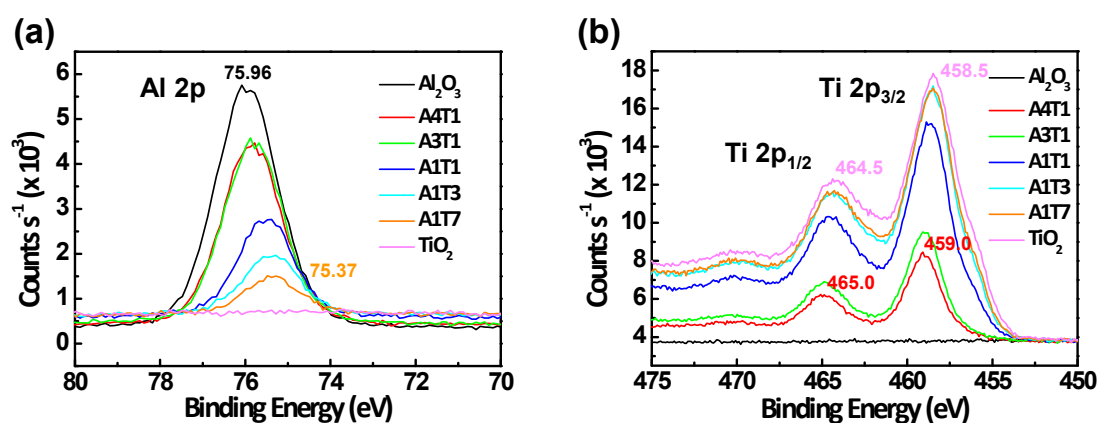

**Figure S1.** X-ray photoemission (XPS) spectra of the  $\text{Al}_2\text{O}_3$ ,  $\text{TiO}_2$ , and  $\text{Al}_2\text{O}_3/\text{TiO}_2$  nanolaminate films, collected from the (a) Al 2p and (b) Ti 2p core levels.

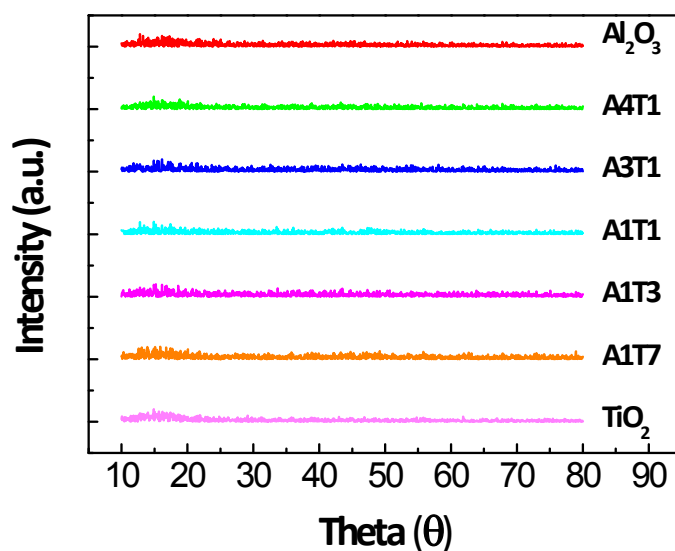

**Figure S2.** The X-ray diffraction (XRD) spectra of 50 nm thick  $\text{Al}_2\text{O}_3$ ,  $\text{TiO}_2$ , and  $\text{Al}_2\text{O}_3/\text{TiO}_2$  nanolaminate films on glass. No peaks were not detected.

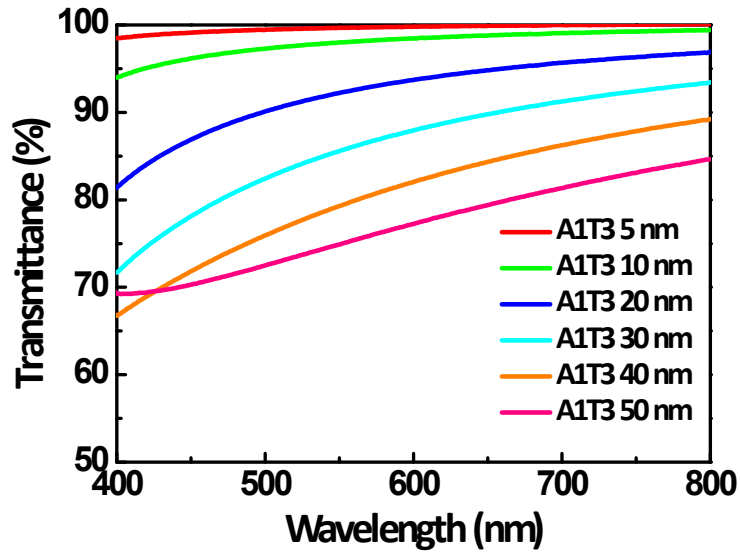

**Figure S3.** The optical transmittance spectra of the A1T3 films prepared with various thicknesses values.

**Table S1.** The dielectric constants of the  $\text{Al}_2\text{O}_3$ ,  $\text{TiO}_2$ , and  $\text{Al}_2\text{O}_3/\text{TiO}_2$  nanolaminate films.

| PEALD based Film        | Dielectric Constant |
|-------------------------|---------------------|
| $\text{Al}_2\text{O}_3$ | 7.9                 |
| A4T1                    | 11.5                |
| A3T1                    | 13.6                |
| A1T1                    | 15.4                |
| A1T3                    | 23.8                |
| A1T7                    | 25.4                |
| $\text{TiO}_2$          | 29.6                |

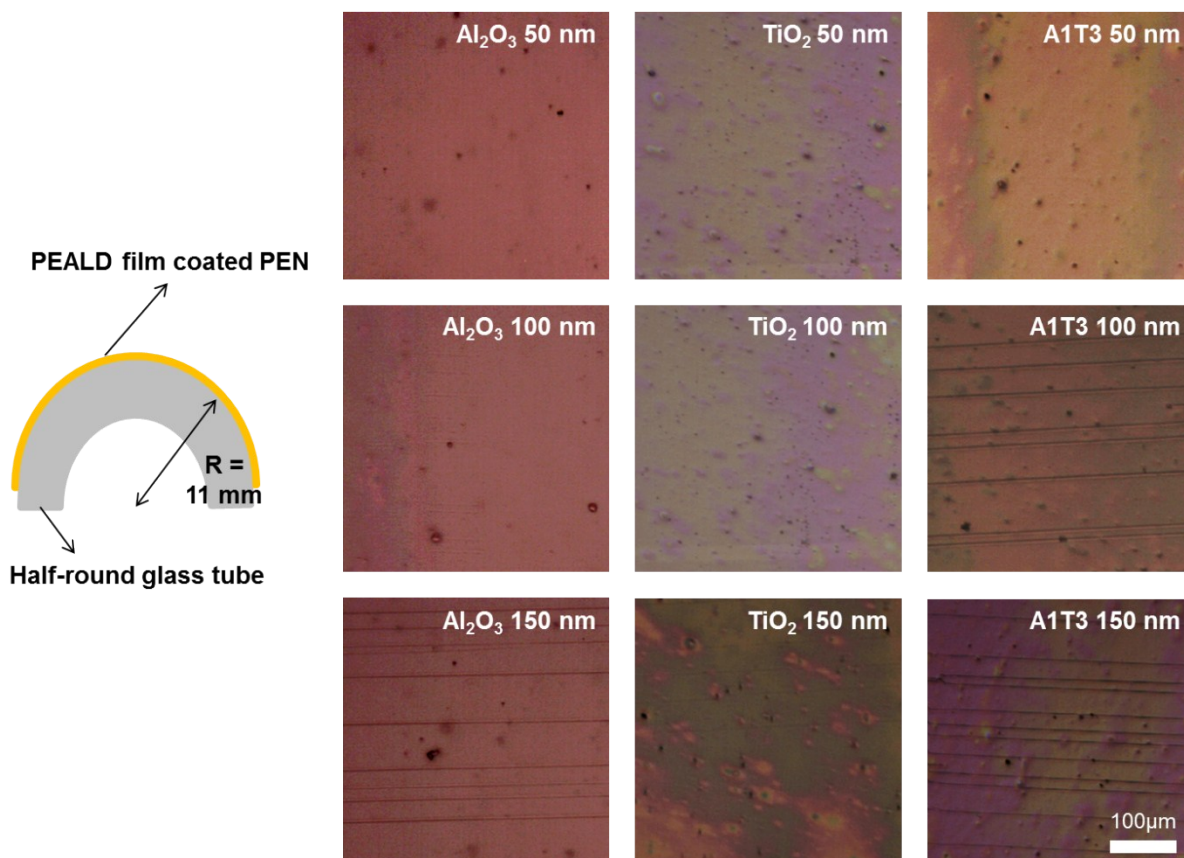

**Figure S4.** Optical microscope images for PEALD-based films on PEN substrate after 500 times cyclic bending test with a bending radius of 11 mm. Cracks were observed at thickness of 150 nm for all films and 100 nm thick A1T3 film. We confirmed that all PEALD-based films were flexible in less than 50 nm thick at bending radius of 11 mm.

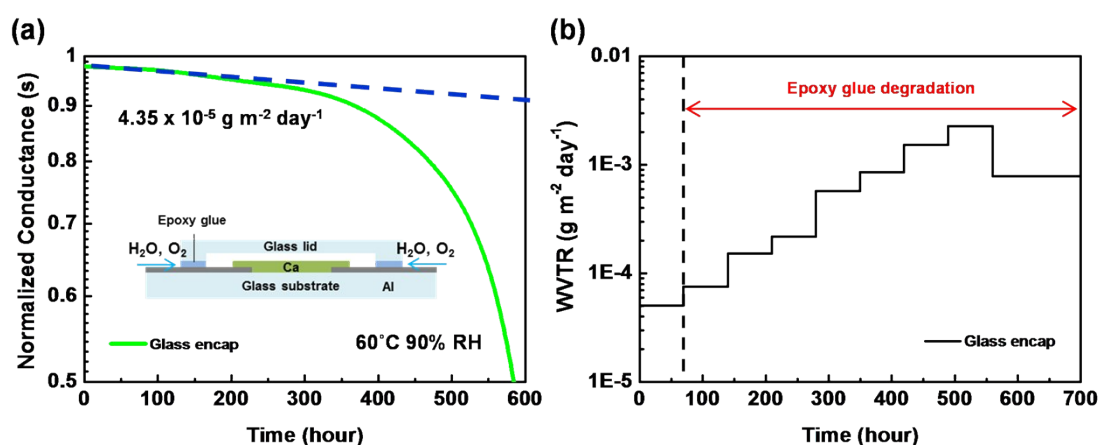

**Figure S5.** (a) Normalized conductance changes and (b) WVTR values of the glass-encapsulated Ca test cell as a function of time at 60°C and 90% RH. The inset shows a schematic diagram of the glass-encapsulated Ca test cell.

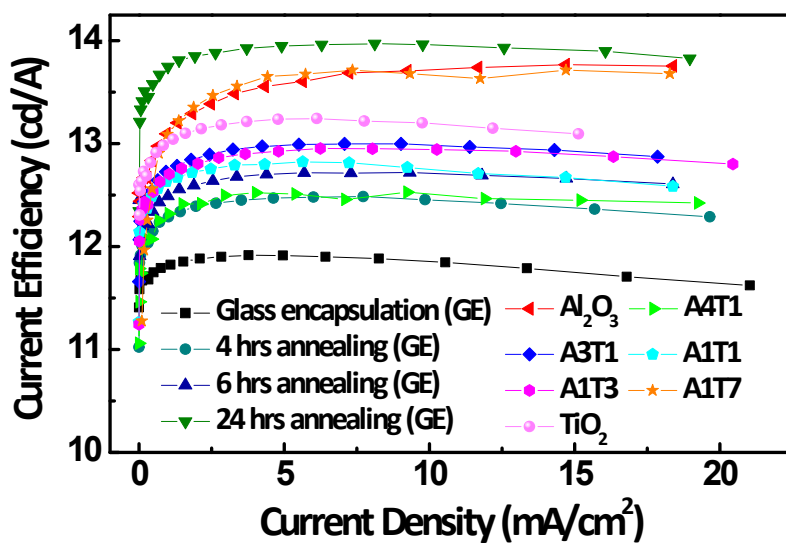

**Figure S6.** Current efficiencies of the glass-encapsulated devices and the devices passivated with PEALD films.

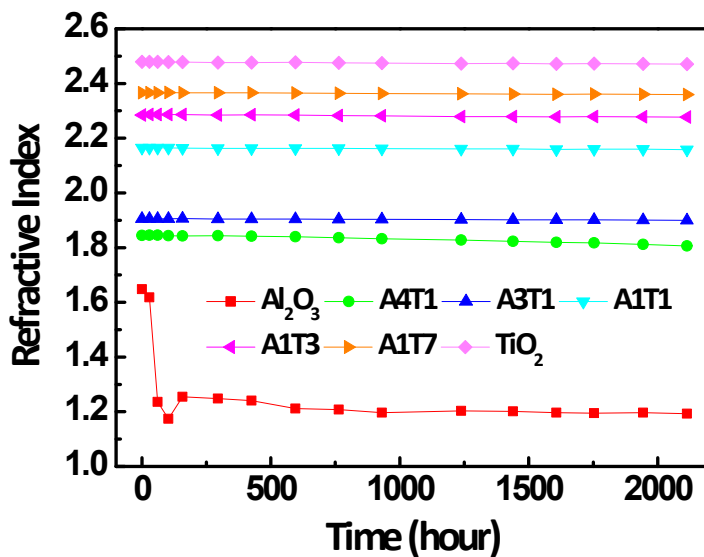

**Figure S7.** Refractive indices of the 50 nm thick PEALD-based films prepared on a Si wafer over time in water at room temperature. All PEALD films were grown at 100°C.
